# Supplementary material
Source: PubMed Central journal article supplement (PMC4187881)
Supplement: IAI.02207-14_zii999090876so1.pdf [file IAI.02207-14_zii999090876so1.pdf]

## Supporting Information

### The mycobacterial gene *cuvA/Rv1422* is required for optimal carbon-source utilization and virulence

Mushtaq Mir<sup>1\*</sup>, Sladjana Priscic<sup>1</sup>, Choong-Min Kang<sup>1\*\*</sup>, Shichun Lun<sup>2</sup>, Haidan Guo<sup>2</sup>, Jeffrey Murry<sup>3\*\*\*</sup>, Eric Rubin<sup>3</sup>, Robert N. Husson<sup>1\*\*\*\*</sup>

<sup>1</sup>Division of Infectious Diseases, Children's Hospital, Harvard Medical School, Boston, MA, 02115

<sup>2</sup>Center for Tuberculosis Research, Johns Hopkins University School of Medicine, Baltimore, MD

<sup>3</sup>Department of Immunology and Infectious Diseases, Harvard School of Public Health, Boston, MA 02115

\*Current address: Wadsworth Center, Albany, NY

\*\*Current address: Department of Biological Sciences, California State University Stanislaus, Turlock, CA 95382

\*\*\*Current address: Gilead Sciences, 333 Lakeside Drive, Foster City, CA 94404

#### \*\*\*\*Corresponding author information:

Robert N. Husson  
Division of Infectious Diseases  
Children's Hospital Boston  
300 Longwood Ave.  
Boston, MA 02115  
Tel 617-919-2900  
Fax 617-730-0254  
robert.husson@childrens.harvard.edu

## Supporting Methods

### Time-lapse microscopy

600  $\mu$ L sterile 1% agarose made in Middlebrook 7H9 medium containing 0.2% acetamide was poured into a rectangular chamber made of 4 Frame-Seals (Bio-Rad) on a glass slide and a coverslip was immediately placed over the agarose to smoothen the surface. After solidification of the agarose, the coverslip was removed and 5/6<sup>th</sup> of the agarose pad was discarded. *M. smegmatis* containing plasmid pMV306Ac-*Rv1422-gfp* (RH558), grown in 7H9 broth to an O.D<sub>600</sub> of 0.5 and washed in minimal medium was then spotted on the remaining agarose pad. The chamber was closed with a new coverslip and the slide was incubated at 37°C for 15 hrs before being observed under a TK spinning Disk Confocal microscope using 63x oil objective. The images were captured manually every 20 min using filters for GFP and phase contrast. The images were acquired using Slidebook 4 and a movie was created in imageJ.

### Cellular Localization of PBP1

For localization of *M. smegmatis* PBP1 (encoded by *MSMEG\_6900*), a C-terminal *MSMEG\_6900*-RFP fusion protein was expressed. The *MSMEG6900* gene was amplified by PCR from *M. smegmatis* genomic DNA using primers *MSMEG6900-F* and *MSMEG6900-R*. Similarly *rfp* was PCR-amplified using primers *Rfp\_F* and *Rfp\_R*. Overlap PCR was then carried out using the primers *MSMEG6900-F* and *Rfp\_R*. The resulting fusion PCR product was cloned into the *NdeI* and *XbaI* sites in pMV261Ac 3' of the acetamidase promoter to obtain pMV261Ac-*MSMEG6900-rfp*. This construct was transformed into wild type and *cuvA*<sub>Ms</sub> deletion strains of *M. smegmatis*, cells were grown in liquid MM containing 0.2% glucose or 0.01% cholesterol for 6-8 hours and examined by DIC and fluorescence microscopy as described for localization of *CuvA*.

**Table S1. Primers, plasmids and strains used in this study**

| <b>Primer</b>           | <b>Sequence</b>                                   |
|-------------------------|---------------------------------------------------|
| Rv1422AE                | Ggatccattaatgaattcgatgaccgatggcatcgtcgcg          |
| Rv1422rPac1             | Cttctcctttgtagccatgtaattaagcgccacgcgctcaccctcg    |
| GFP3Pac1                | Gacgacgcgtggcgcttaattaacatggctagcaaaggagaagaacttt |
| GFP4XK                  | Ggttctagaggtaacctcagccatgtgtaatcccagcagcag        |
| <i>MSMEG3080-cond-1</i> | Ctagtctagaacaggtggaccgggtatg                      |
| <i>MSMEG3080-cond-2</i> | Gttggcacagtccgttcctaattaagacgatgcgctcgtggtgcat    |
| <i>MSMEG3080-cond-3</i> | Ggaacggactgtgccaac                                |
| <i>MSMEG3080-cond-4</i> | Ctagtctagagactcgggtgctggggatg                     |
| <i>MSMEG3080-us</i>     | Gcgcgtgctgcaccgggacctgggtcgcg                     |
| <i>MSMEG3080-ds</i>     | Gctcagctcgtccttcacctcggctgtc                      |
| <i>MSMEG3080-int-1</i>  | Gcgacgcatatgtgctaattaacatgacaccacgcatcgtcgcctcgga |
| <i>MSMEG3080-int-2</i>  | Ggacagatcgagaggggatgccccgtggcgacctgggtgatatcgacg  |
| yrbE4A-F                | Gtacaaggcccgcccttgatccaacaacttgcggttc             |
| yrbE4A-R                | Gcggatatctactgcgccgagattcgcac                     |
| mCherry-F               | Gcatgctaattaagaaggagatatacatatggtgagcaagggcgaggag |
| mCherry-yrbE4A_R        | Gatcaaggcggcggcctgtacagctcgtccatgc                |
| mCherry_R               | Gtcgcgatctactgttacagctcgtccatg                    |
| <i>MSMEG6900_F</i>      | Ggaatccatatgaataacgaagggcgccac                    |
| <i>MSMEG6900_R</i>      | Ggaggaggccatgtaattaacggaggcggcggggctccggg         |
| Rfp_F                   | Tccgtaattaacatggcctcctccgaggacgtc                 |
| Rfp_R                   | Gcaagtctagatcaagcggcggaggagtggc                   |
| PbpA_F                  | Gaggatccatatgaacgcctctctgcgccg                    |
| PbpA_R                  | Ggcatgtaattaatggtccccctgcagtgc                    |

| <b>Plasmid</b>       | <b>Characteristics</b>                                                                                                                                                                                                     | <b>Source</b> |
|----------------------|----------------------------------------------------------------------------------------------------------------------------------------------------------------------------------------------------------------------------|---------------|
| pRH1351              | An Integrating vector that contains the counter-selection marker <i>sacB</i> , a gentamicin resistance gene, a catechol 2,3-dioxygenase gene ( <i>xyIE</i> ) and a temperature sensitive mycobacterial replication origin. | (1)           |
| pMV306Ac             | A mycobacterial integrating vector containing the acetamidase promoter, Kan <sup>R</sup>                                                                                                                                   | This study    |
| pMV306Ac- <i>gfp</i> | An integrating vector having <i>gfp</i> cloned downstream to the acetamidase promoter,                                                                                                                                     | This study    |

|                                                 |                                                                                                                    |            |
|-------------------------------------------------|--------------------------------------------------------------------------------------------------------------------|------------|
| pMV306Ac-Rv1422-gfp                             | An Integrating vector having <i>Rv1422-gfp</i> cloned downstream to the acetamidase                                | This study |
| pJEB402                                         | Integrating vector containing the <i>hsp70</i> (MOP) promoter, Kan <sup>R</sup>                                    | (2)        |
| pJEB-Rv1422                                     | <i>Rv1422</i> cloned downstream to MOP promoter in pJEB402, Kan <sup>R</sup>                                       | This study |
| pMind                                           | Replicating shuttle vector with tet promoter, coli EI ori, pAL1500 ori, Kan <sup>R</sup> , Hyg <sup>R</sup>        | (3)        |
| pMind-MSMEG3080                                 | MSMEG3080 cloned downstream to tet promoter in pMind, Kan <sup>R</sup>                                             | This study |
| pMV261-P <sub>tet</sub> - <i>mCherry-yrbE4A</i> | <i>mCherry-yrbE4A</i> cloned downstream to tet promoter in replicating vector, Hyg <sup>R</sup> , Kan <sup>R</sup> | This study |
| pMV261-P <sub>tet</sub> - <i>mCherry</i>        | <i>mCherry</i> cloned downstream to tet promoter in replicating vector, Hyg <sup>R</sup>                           | This study |
| pMV261Ac-MSMEG6900-rfp                          | MSMEG6900- <i>rfp</i> cloned downstream to the acetamidase promoter in replicating vector,                         | This study |
| pMV261Ac- <i>pbpA-rfp</i>                       | <i>pbpA-rfp</i> cloned downstream to the acetamidase promoter in replicating vector,                               | This study |
| pMV261Ac- <i>rfp</i>                            | <i>rfp</i> cloned downstream to acetamidase promoter in replicating vector, Hyg <sup>R</sup>                       | This study |

| Strain                                      | Characteristics                                                                                                                           | Source         |
|---------------------------------------------|-------------------------------------------------------------------------------------------------------------------------------------------|----------------|
| <i>E. coli</i> Top10                        | Cloning strain                                                                                                                            | Invitrogen     |
| <i>M. smegmatis</i> mc <sup>2</sup> 155     | Wild type                                                                                                                                 | (4)            |
| <i>M. tuberculosis</i> H37Rv                | Wild type                                                                                                                                 | Lab collection |
| <i>M. tuberculosis</i> mc <sup>2</sup> 6206 | $\Delta$ <i>leuD</i> $\Delta$ <i>panCD</i> double auxotroph of <i>M. tuberculosis</i> H37Rv                                               | (5)            |
| RH477                                       | MSMEG3080 deletion mutant in <i>M. smegmatis</i> mc <sup>2</sup> 155                                                                      | This study     |
| RH478                                       | <i>Rv1422</i> deletion strain in <i>M. tuberculosis</i> H37Rv                                                                             | This study     |
| RH479                                       | RH478 containing pJEB402 integrated at <i>attB</i> site, Kan <sup>R</sup> , Hyg <sup>R</sup>                                              | This study     |
| RH480                                       | RH478 containing plasmid pJEB-Rv1422 integrated at <i>attB</i> site, Kan <sup>R</sup> , Hyg <sup>R</sup>                                  | This study     |
| RH481                                       | Wild type strain harboring plasmid pJEB402 integrated at <i>attB</i> site, Kan <sup>R</sup>                                               | This study     |
| RH558                                       | Wild type <i>M. smegmatis</i> mc <sup>2</sup> 155 containing plasmid pMV306Ac-Rv1422-gfp integrated at <i>attB</i> site, Kan <sup>R</sup> | This study     |
| RH555                                       | Wild type <i>M. smegmatis</i> mc <sup>2</sup> 155 containing pMV261Ac- <i>rfp</i> , Hyg <sup>R</sup>                                      | This study     |
| RH661                                       | Wild type <i>M. smegmatis</i> mc <sup>2</sup> 155 containing plasmid pMV261-P <sub>tet</sub> - <i>mCherry-YrbE4A</i> , Hyg <sup>R</sup> , | This study     |

|       |                                                                                                                                                   |            |
|-------|---------------------------------------------------------------------------------------------------------------------------------------------------|------------|
| RH741 | Wild type <i>M. smegmatis</i> mc <sup>2</sup> 155 containing plasmid pMV261Ac- <i>pbpA-rfp</i> , Kan <sup>R</sup>                                 | This study |
| RH773 | MSMEG3080 deletion strain of <i>M. smegmatis</i> containing pMV261Ac-MSMEG6900- <i>rfp</i> , Kan <sup>R</sup>                                     | This study |
| RH861 | Wild type <i>M. smegmatis</i> mc <sup>2</sup> 155 containing plasmid pMV261-P <sub>tet</sub> - <i>mCherry</i> , Hyg <sup>R</sup>                  | This study |
| RH862 | MSMEG3080 deletion strain of <i>M. smegmatis</i> containing pMV306-P <sub>tet</sub> - <i>mCherry-YrbE4A</i> , Hyg <sup>R</sup> , Kan <sup>R</sup> | This Study |
| RH893 | <i>M. tuberculosis</i> mc2-6206 containing pMV306Ac- <i>Rv1422-gfp</i> inserted at <i>attB</i> site,                                              | This study |

### Supporting Methods References

1. **Raman S, Song T, Puyang X, Bardarov S, Jacobs Jr. W, Husson R.** 2001. The alternative sigma factor SigH regulates major components of the oxidative and heat stress responses in *Mycobacterium tuberculosis*. *J Bacteriol* **183**:6119-6125.
2. **Farrow MF, Rubin EJ.** 2008. Function of a mycobacterial major facilitator superfamily pump requires a membrane-associated lipoprotein. *J. Bacteriol.* **190**:1783-1791.
3. **Blokpoel MC, Murphy HN, O'Toole R, Wiles S, Runn ES, Stewart GR, Young DB, Robertson BD.** 2005. Tetracycline-inducible gene regulation in mycobacteria. *Nucleic Acids Res* **33**:e22.
4. **Snapper SB, Melton RE, Mustafa S, Kieser T, Jacobs WR, Jr.** 1990. Isolation and characterization of efficient plasmid transformation mutants of *Mycobacterium smegmatis*. *Mol Microbiol* **4**:1911-1919.
5. **Sampson SL, Dascher CC, Sambandamurthy VK, Russell RG, Jacobs WR, Bloom BR, Hondalus MK.** 2004. Protection elicited by a double leucine and pantothenate auxotroph of *Mycobacterium tuberculosis* in guinea pigs. *Infect immun* **72**:3031-3037.
