# Supplementary material
Source: PubMed Central journal article supplement (PMC4187881)
Supplement: IAI.02207-14_zii999090876so2.pdf [file IAI.02207-14_zii999090876so2.pdf]

*M. tuberculosis**M. smegmatis*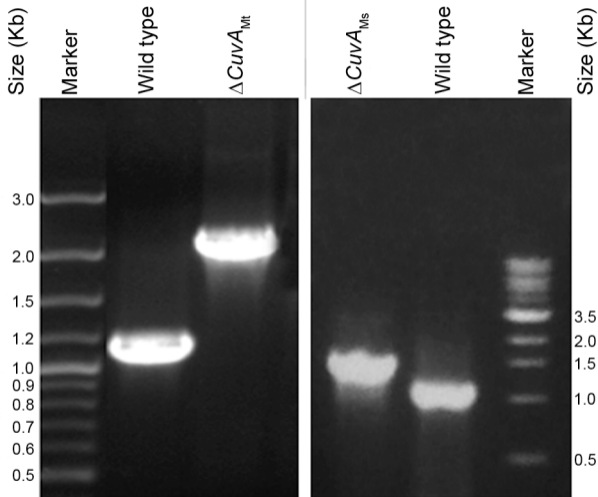

**Fig. S1.** PCR analysis of  $\Delta cuvA_{Mt}$  and  $\Delta cuvA_{Ms}$ . Genomic DNA isolated from wild type *M. tuberculosis* H37Rv, *M. tuberculosis*  $\Delta cuvA_{Mt}$ , wild type *M. smegmatis* and *M. smegmatis*  $\Delta cuvA_{Ms}$  were amplified with primers flanking the *Rv1422* and *MSMEG\_3080* genes. Expected sizes of PCR products are: wild type *M. tuberculosis*, 1.091 kb;  $\Delta cuvA_{Mt}$ , 2.091 kb; wild type *M. smegmatis*, 1.065 kb;  $\Delta cuvA_{Ms}$ , 1.5 kb.

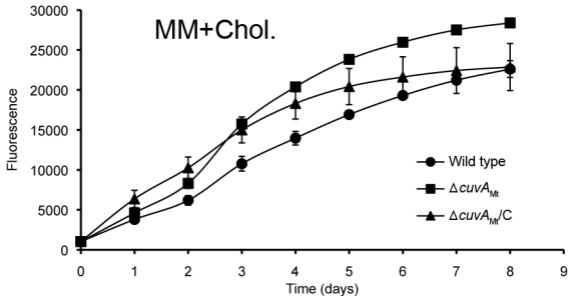

**Fig. S2.** Wild type *M. tuberculosis* H37Rv,  $\Delta\text{cuvA}_{\text{Mt}}$  and complemented  $\Delta\text{cuvA}$  ( $\Delta\text{cuvA}_{\text{Mt}}/\text{C}$ ) strains were diluted to  $\text{OD}_{600}=0.005$  and analyzed using the MABA in MM containing 0.01% cholesterol. Data from one of 2 biological replicates, with measurements obtained from duplicate wells. Error bars are  $\pm 1$  S.D.

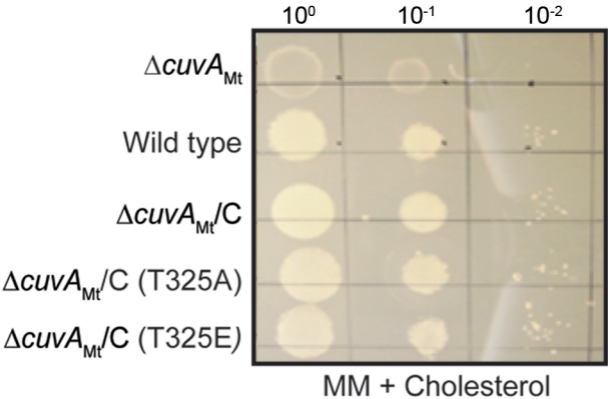

**Fig. S3.** *M. tuberculosis* wild type H37Rv,  $\Delta\text{cuvA}_{\text{Mt}}$  and  $\Delta\text{cuvA}_{\text{Mt}}$  complemented with the wild type *cuvA*<sub>Mt</sub> allele or with alleles encoding *cuvA*<sub>Mt</sub> with non-phosphorylatable (T325A) or phosphomimetic (T325E) substitutions grown on MM agar plus cholesterol.

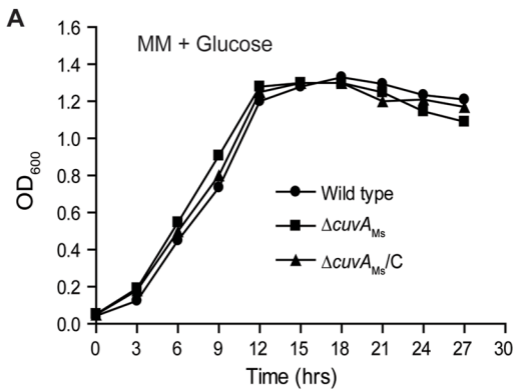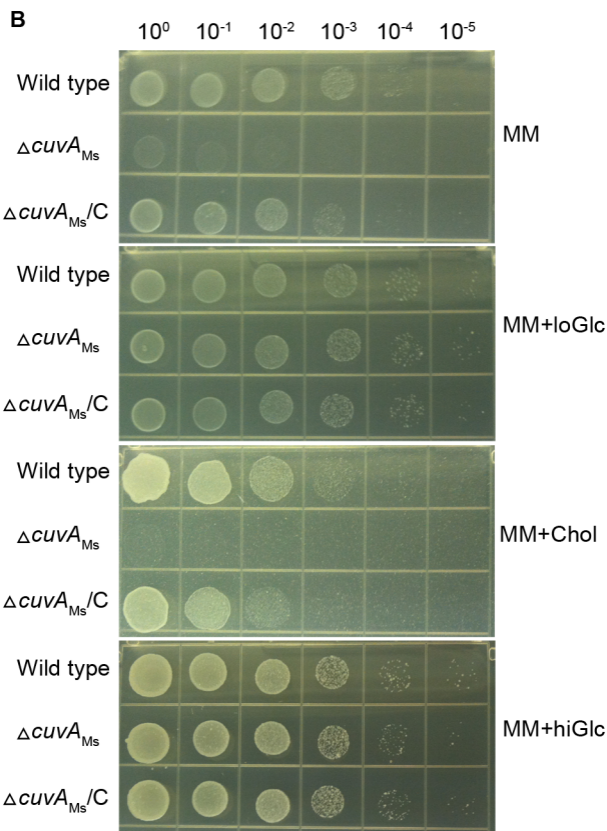

**Fig. S4. A.** Growth of *M. smegmatis* wild type,  $\Delta\text{cuvA}_{\text{Ms}}$  and complemented  $\Delta\text{cuvA}_{\text{Ms}}$  strains in Middlebrook 7H9-ADC-Tw medium containing 0.2% glucose, measured by OD<sub>600</sub>. Data shown are from a single experiment that was repeated once with similar results. **B.** Growth of *M. smegmatis* wild type,  $\Delta\text{cuvA}_{\text{Ms}}$  and complemented  $\Delta\text{cuvA}_{\text{Ms}}$  strains on MM agar alone or MM agar plus 0.01% glucose, 0.01% cholesterol or 0.2% glucose.

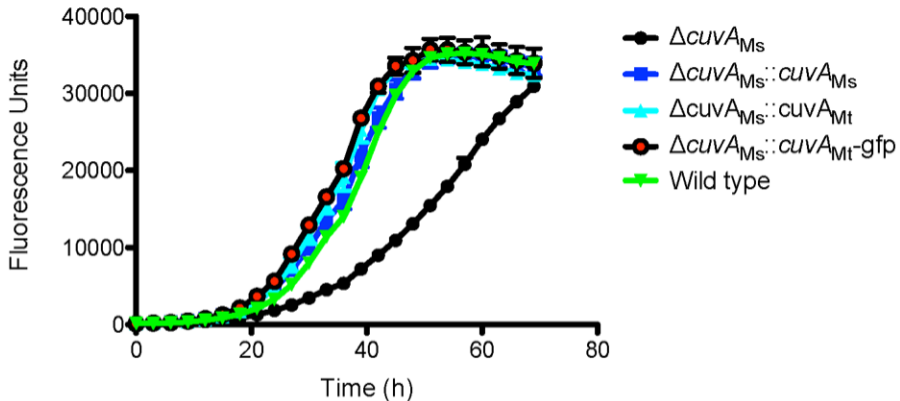

**Fig. S5.** MABA analysis of *M. smegmatis* wild type,  $\Delta cuvA_{Ms}$  and  $\Delta cuvA_{Ms}$  complemented with  $cuvA_{Ms}$ ,  $cuvA_{Mt}$  or  $cuvA_{Mt}\text{-gfp}$  grown in MM plus 0.01% cholesterol. Growth of  $\Delta cuvA_{Ms}$  strain is significantly different from all other strains ( $P < 0.0001$ ). There are no significant differences between the growth of wild type and  $\Delta cuvA_{Ms}$  complemented with  $cuvA_{Ms}$ ,  $cuvA_{Mt}$  or  $cuvA_{Mt}\text{-gfp}$  ( $P > 0.05$  for all comparisons).

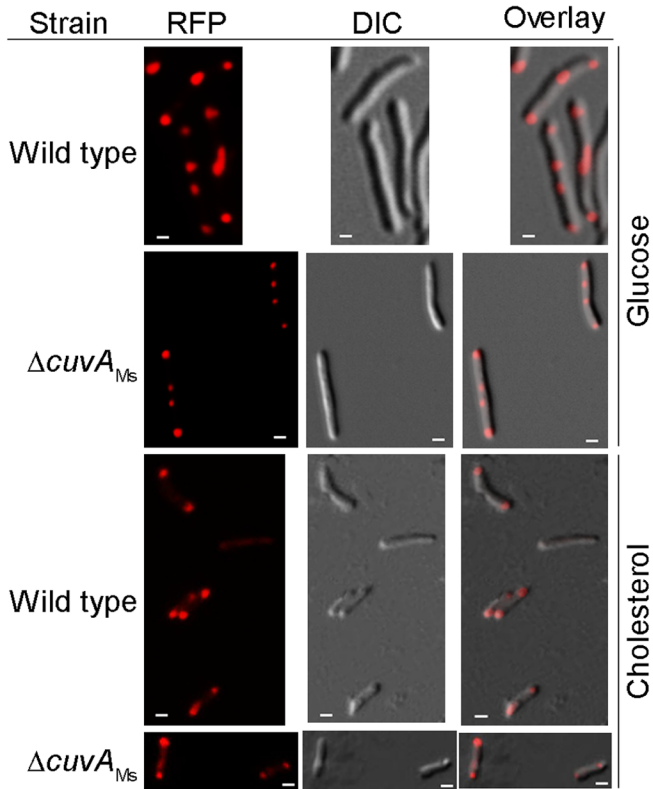

**Fig. S6.** Localization of PBP1-RFP. Wild type *M. smegmatis* cells expressing PBP1-RFP or RFP alone were grown in MM containing 0.2% glucose or 0.01% cholesterol as the carbon source, and examined by fluorescence and DIC microscopy after 16 hrs. Bar = 1  $\mu\text{m}$ .

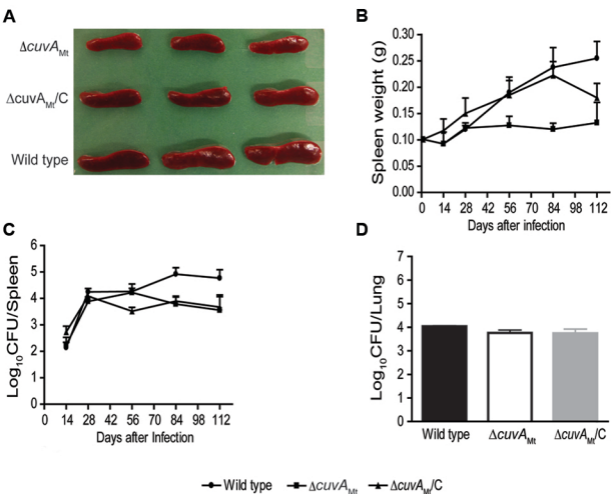

**Fig. S7.** Mouse infection with wild type H37Rv,  $\Delta cuvA_{Mt}$  or the  $\Delta cuvA_{Mt}$  complemented strain. For all graphs, error bars are  $\pm 1$  S.D for the mean data from four mice at each time point. **A.** Gross pathology of spleens from day 84 following infection. **B.** Spleen weight of mice infected with each strain from 0 to 112 days following infection. **C.** CFU in spleen from day 14 to day 112 following infection. **D.** Lung inocula for the survival experiment (Fig. 7 in main text) for each strain on day 1 after infection. Data are the mean CFU from 3 mice. Error bars = 1 SD.

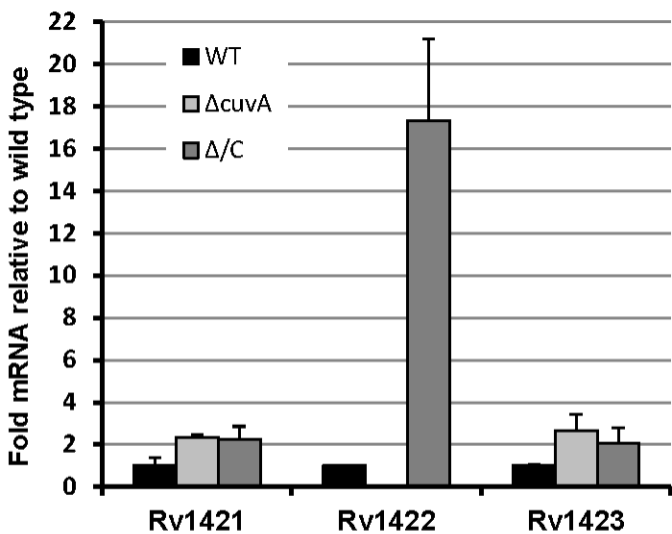

**Fig. S8.** Relative expression of genes in the *Rv1421-Rv1423* operon in wild type H37Rv,  $\Delta\text{cuvA}_{\text{Mt}}$  and  $\Delta\text{cuvA}_{\text{Mt}}$  complemented strains.
